# Supplementary material for: Characterization of Composition and Antifungal Properties of Leaf Secondary Metabolites from Thirteen Cultivars of Chrysanthemum morifolium Ramat
Source: PubMed Central journal article supplement (PMC6935761; doi:10.3390/molecules24234202), 2019-11-20
Supplement: molecules-24-04202-s001.pdf [file molecules-24-04202-s001.pdf]

Supplementary materials:

**Table S1.** Apolar secondary metabolites identified in the leaf extracts of 13 cultivars of *C. morifolium* ( $\mu\text{g g}^{-1}$ )

| NO.                   | Compounds    | Retention Index <sup>a</sup> | Cultivars               |              |                         |            |             |            |             |            |             |             |             |             |             |
|-----------------------|--------------|------------------------------|-------------------------|--------------|-------------------------|------------|-------------|------------|-------------|------------|-------------|-------------|-------------|-------------|-------------|
|                       |              |                              | Cm1                     | Cm2          | Cm3                     | Cm4        | Cm5         | Cm6        | Cm7         | Cm8        | Cm9         | Cm10        | Cm11        | Cm12        | Cm13        |
| <b>Terpenoids</b>     |              |                              |                         |              |                         |            |             |            |             |            |             |             |             |             |             |
| <b>Monoterpenoids</b> |              |                              |                         |              |                         |            |             |            |             |            |             |             |             |             |             |
| 1                     | fenchone     | 938                          | 1.95 ±0.54 <sup>a</sup> | 2.05 ±1.00   | 5.76 ±2.97              | 1.98 ±0.03 | ND          | ND         | 5.73 ±3.58  | ND         | 1.30 ±0.24  | 2.50 ±0.58  | 4.32 ±0.50  | 1.71 ±0.38  | 2.46 ±0.34  |
| 2                     | limonene     | 1033                         | ND <sup>b</sup>         | ND           | ND                      | ND         | ND          | ND         | 5.57 ±2.73  | 1.02 ±0.26 | ND          | ND          | 8.02 ±1.11  | 0.67 ±0.05  | ND          |
| 3                     | 1,8-cineole  | 1037                         | 19.98 ±1.93             | 31.29 ±19.33 | 8.91 ±3.90              | 1.25 ±0.10 | 14.65 ±1.77 | 2.64 ±1.40 | 6.47 ±2.09  | 4.28 ±0.82 | 20.59 ±2.59 | 28.23 ±5.59 | 19.05 ±1.34 | 19.77 ±3.87 | 36.35 ±4.60 |
| 4                     | filifolone   | 1110                         | ND                      | ND           | 8.40 ±1.69 <sup>b</sup> | 4.64 ±0.47 | ND          | ND         | ND          | ND         | ND          | ND          | ND          | 4.92 ±2.35  | 16.53 ±1.95 |
| 5                     | allo-ocimene | 1134                         | ND                      | ND           | 4.65 ±2.60              | 2.92 ±0.41 | 20.23 ±1.41 | ND         | 1.62 ±0.38  | ND         | 12.59 ±0.79 | 2.66 ±0.63  | 3.24 ±1.54  | 16.89 ±0.81 | ND          |
| 6                     | camphor      | 1151                         | 33.95 ±3.10             | ND           | 2.90 ±0.89              | ND         | 3.32 ±0.41  | ND         | 17.51 ±4.73 | 1.69 ±0.41 | 44.51 ±3.48 | 8.20 ±1.46  | 11.48 ±1.15 | 4.69 ±0.14  | 3.79 ±0.59  |

|                         |                               |      |             |              |              |               |               |             |             |              |               |               |               |               |             |  |
|-------------------------|-------------------------------|------|-------------|--------------|--------------|---------------|---------------|-------------|-------------|--------------|---------------|---------------|---------------|---------------|-------------|--|
| 7                       | endo-borneol                  | 1172 | 51.03 ±4.50 | 16.99 ±8.91  | 10.27 ±1.40  | ND            | 12.56 ±1.04   | 8.17 ±3.85  | 6.52 ±3.16  | 2.86 ±0.22   | 7.93 ±0.80    | ND            | 50.51 ±4.33   | 19.13 ±1.99   | ND          |  |
| 8                       | ( <i>E</i> )-ocimene          | 1247 | ND          | ND           | 4.52 ±0.84   | 2.47 ±0.32    | ND            | ND          | ND          | ND           | ND            | 3.31 ±0.82    | ND            | ND            | 10.34 ±1.06 |  |
| 9                       | isopiperitenone               | 1279 | ND          | ND           | 9.01 ±1.75   | ND            | ND            | ND          | ND          | ND           | ND            | 6.77 ±1.91    | ND            | ND            | 19.02 ±1.95 |  |
| <b>Sesquiterpenoids</b> |                               |      |             |              |              |               |               |             |             |              |               |               |               |               |             |  |
| 10                      | β-elemene                     | 1401 | ND          | ND           | 18.12 ±4.74  | 9.49 ±2.02    | ND            | 20.88 ±3.11 | 20.27 ±4.73 | 25.96 ±4.91  | 84.42 ±5.30   | 12.79 ±4.84   | 33.21 ±3.58   | 11.50 ±6.29   | 39.65 ±3.82 |  |
| 11                      | β-ylangene                    | 1430 | 30.72 ±7.50 | 39.48 ±20.49 | 41.42 ±5.13  | 62.83 ±6.36   | 141.42 ±5.38  | 29.00 ±5.37 | 32.04 ±7.65 | 24.92 ±5.04  | 95.04 ±5.99   | 47.85 ±14.53  | 95.72 ±27.17  | 131.12 ±7.22  | 35.64 ±7.15 |  |
| 12                      | epi-bicyclosesquiphellandrene | 1440 | 8.98 ±2.13  | 12.49 ±6.90  | 11.91 ±3.53  | 11.64 ±1.72   | 31.42 ±2.15   | 7.71 ±1.47  | 8.70 ±2.13  | 9.30 ±2.33   | 18.75 ±1.88   | 13.13 ±3.69   | 36.53 ±12.79  | 30.51 ±1.19   | 14.91 ±2.69 |  |
| 13                      | γ-murolene                    | 1455 | 3.50 ±0.23  | ND           | 4.57 ±1.60   | 4.64 ±0.58    | 11.70 ±0.79   | 2.70 ±0.48  | 3.00 ±0.76  | 3.36 ±0.96   | 6.88 ±0.70    | 4.94 ±1.53    | 13.80 ±5.01   | 11.23 ±0.39   | 5.47 ±0.91  |  |
| 14                      | ( <i>E</i> )-β-farnesene      | 1464 | 8.14 ±1.89  | 10.49 ±6.70  | 9.87 ±2.08   | 19.75 ±2.93   | 27.80 ±1.41   | 6.06 ±1.36  | 7.06 ±1.69  | 8.42 ±1.68   | 29.65 ±2.17   | 14.91 ±3.96   | 25.27 ±7.95   | 25.75 ±0.76   | 7.09 ±4.91  |  |
| 15                      | germacra-1(10),4(15),5-triene | 1488 | 21.55 ±3.62 | ND           | 7.41 ±1.59   | 35.15 ±11.69  | 8.01 ±3.04    | ND          | ND          | 18.03 ±12.84 | ND            | 10.24 ±7.87   | 7.33 ±4.08    | 7.37 ±0.03    | ND          |  |
| 16                      | α-curcumene                   | 1491 | 32.05 ±5.69 | 37.49 ±19.03 | 49.78 ±9.06  | 64.97 ±2.15   | 148.68 ±8.55  | 23.01 ±2.88 | 24.72 ±4.88 | 37.43 ±4.95  | 84.83 ±54.05  | 79.32 ±31.77  | 126.57 ±24.09 | 156.06 ±23.80 | 43.16 ±9.63 |  |
| 17                      | β-selinene                    | 1494 | 4.53 ±1.09  | ND           | ND           | 15.04 ±2.65   | ND            | ND          | ND          | ND           | 13.06 ±0.06   | 93.93 ±26.90  | ND            | ND            | 66.15 ±9.66 |  |
| 18                      | zingiberene                   | 1503 | ND          | ND           | 111.26 ±7.00 | 184.02 ±35.24 | 116.33 ±22.98 | ND          | 7.99 ±2.47  | 46.30 ±19.02 | 204.17 ±96.78 | 164.07 ±92.97 | 105.09 ±32.97 | 94.61 ±29.92  | ND          |  |

|                               |                                |      |                   |                   |                  |                    |                  |                   |                   |                  |                   |                   |                  |                  |                   |
|-------------------------------|--------------------------------|------|-------------------|-------------------|------------------|--------------------|------------------|-------------------|-------------------|------------------|-------------------|-------------------|------------------|------------------|-------------------|
| 19                            | $\gamma$ -cadinene             | 1508 | 1.91 $\pm$ 0.83   | 5.79 $\pm$ 2.85   | 7.29 $\pm$ 1.85  | ND                 | 13.13 $\pm$ 2.35 | ND                | ND                | 5.68 $\pm$ 2.06  | 10.49 $\pm$ 1.88  | 6.78 $\pm$ 2.71   | 17.08 $\pm$ 5.62 | 13.60 $\pm$ 0.96 | 6.02 $\pm$ 1.55   |
| 20                            | $\alpha$ -farnesene            | 1515 | ND                | 29.66 $\pm$ 20.44 | 22.72 $\pm$ 5.45 | 38.25 $\pm$ 3.37   | 51.08 $\pm$ 2.90 | 14.18 $\pm$ 2.48  | 8.46 $\pm$ 2.97   | 11.68 $\pm$ 0.66 | 10.55 $\pm$ 0.59  | 42.40 $\pm$ 13.01 | 21.56 $\pm$ 2.30 | 46.02 $\pm$ 3.13 | 9.25 $\pm$ 1.91   |
| 21                            | $\beta$ -sesquiphellandrene    | 1532 | 47.25 $\pm$ 12.11 | 4.46 $\pm$ 3.07   | 5.86 $\pm$ 1.00  | 119.43 $\pm$ 13.50 | 24.08 $\pm$ 0.57 | 10.37 $\pm$ 0.77  | ND                | 29.16 $\pm$ 3.41 | 129.61 $\pm$ 5.68 | 18.97 $\pm$ 4.90  | 9.90 $\pm$ 1.18  | 20.93 $\pm$ 1.67 | ND                |
| 22                            | germacrene D-4-ol              | 1587 | ND                | 9.70 $\pm$ 5.11   | 9.16 $\pm$ 3.54  | ND                 | 27.64 $\pm$ 1.72 | ND                | ND                | ND               | 16.81 $\pm$ 3.76  | 9.64 $\pm$ 2.63   | 11.51 $\pm$ 5.26 | 24.36 $\pm$ 1.44 | 12.20 $\pm$ 1.57  |
| 23                            | $\alpha$ -patchoulene          | 1605 | ND                | 24.39 $\pm$ 11.73 | ND               | ND                 | ND               | 18.89 $\pm$ 2.51  | 18.23 $\pm$ 4.56  | ND               | 28.52 $\pm$ 1.69  | 12.21 $\pm$ 2.98  | ND               | ND               | ND                |
| 24                            | selina-6-en-4-ol               | 1668 | 15.99 $\pm$ 3.82  | 20.57 $\pm$ 13.16 | ND               | ND                 | ND               | ND                | ND                | ND               | ND                | ND                | ND               | ND               | ND                |
| 25                            | longifolenaldehyde             | 1745 | 8.41 $\pm$ 0.96   | ND                | ND               | ND                 | ND               | ND                | ND                | ND               | ND                | ND                | ND               | ND               | ND                |
| <b>Diterpenoids</b>           |                                |      |                   |                   |                  |                    |                  |                   |                   |                  |                   |                   |                  |                  |                   |
| 26                            | phytol                         | 2120 | 23.85 $\pm$ 2.81  | 14.69 $\pm$ 14.34 | 18.16 $\pm$ 8.70 | 16.53 $\pm$ 3.70   | 7.35 $\pm$ 1.22  | 23.55 $\pm$ 13.78 | 27.08 $\pm$ 10.27 | 17.65 $\pm$ 2.85 | 9.32 $\pm$ 3.54   | ND                | ND               | 5.58 $\pm$ 3.85  | 45.81 $\pm$ 27.39 |
| <b>Fatty acid derivatives</b> |                                |      |                   |                   |                  |                    |                  |                   |                   |                  |                   |                   |                  |                  |                   |
| 27                            | 1-octanol, 2-butyl-            | 1085 | ND                | 16.85 $\pm$ 12.35 | ND               | ND                 | ND               | ND                | ND                | 1.82 $\pm$ 0.26  | ND                | ND                | ND               | ND               | ND                |
| 28                            | tetradecane, 2,6,10-trimethyl- | 1497 | 43.74 $\pm$ 3.11  | ND                | ND               | ND                 | ND               | ND                | ND                | ND               | ND                | ND                | ND               | ND               | ND                |
| 29                            | cryptomeridiol                 | 1826 | 7.59 $\pm$ 2.12   | ND                | ND               | ND                 | ND               | ND                | 1.98 $\pm$ 1.22   | ND               | ND                | 10.89 $\pm$ 1.60  | ND               | ND               | ND                |



<sup>a</sup> Mean SD, the mean values received by three samples from the same origin.

<sup>b</sup> Not detected.
